# Supplementary material
Source: PubMed Central journal article supplement (PMC4671198)
Supplement: NIHMS654375-supplement-1.pdf [file NIHMS654375-supplement-1.pdf]

## Supplement Material

**Supplemental figure I. A hypothetical model to explain the role of integrin  $\beta 3$  in endothelial regeneration in AVGs.** Platelet aggregation in AVGs after surgery was decreased in integrin  $\beta 3$  mice, and less CACs were recruited in the denuded subendothelial matrices in integrin  $\beta 3$  mice. The higher level of TGF- $\beta 1$  secreted from integrin  $\beta 3$  platelets delayed the CAC differentiation into mature endothelial cells, resulting in AVG failure.

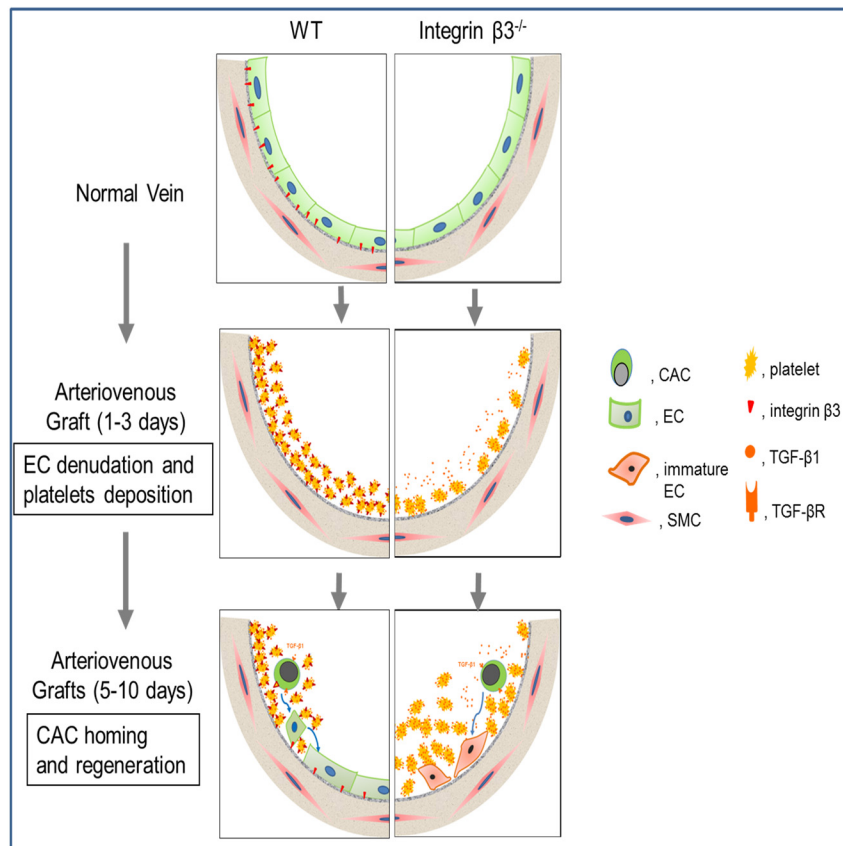

Table 1. Primers used in the manuscript

| Genes         |            | Primers                        |
|---------------|------------|--------------------------------|
| CD31          | upstream   | 5'-AGGCTTGCATAGAGCTCCAG-3'     |
|               | downstream | 5'-TTCTTGGTTTCCAGCTATGG-3'     |
| VE-cadherin   | upstream   | 5'-CAC TGTCAAGGTG CATGATAT-3'  |
|               | downstream | 5'-GTACAAGACA GTGGCGTGGC-3'    |
| RBP-Jk        | upstream   | 5'-CAATGCAAGACCAAGCCCTCCAAT-3' |
|               | downstream | 5'-AGGGTCTTGGCACAACCAAATTCC-3' |
| Notch1        | upstream   | 5'-TGAGACTGCCAAAGTGTTGC-3'     |
|               | downstream | 5'-GTGGGAGACAGAGTGGGTGT-3'     |
| Jagged 1      | upstream   | 5'-TCTCTGACCCCTGCCATAAC-3'     |
|               | downstream | 5'-TTGAATCCATTACCAGATCC-3'     |
| Hes1          | upstream   | 5'-ACACCGGACAAACCAAAGAC-3'     |
|               | downstream | 5'-CGCCTCTTCTCCATGATAGG -3'    |
| Hes5          | upstream   | 5'-AGCTACCTGAAACACAGCAAAGCC-3' |
|               | downstream | 5'-TAAAGCAGCTTCATCTGCGTGTCG-3' |
| SMA- $\alpha$ | upstream   | 5'-CTGACAGAGGCACCACTGAA-3'     |
|               | downstream | 5'-GAAATAGCCAAGCTCAG-3'        |
| S100A4        | upstream   | 5'-TTCCAGAAGGTGATGAG-3'        |
|               | downstream | 5'-TCATGGCAATGCAGGACAGGAAGA-3' |
| GAPDH         | upstream   | 5'-CAGATCCACAACGGATATATTGGG-3' |
|               | downstream | 5'-CATGACAACCTTTGGCATTGTGG-3'  |
